# Supplementary material for: Halogen bonding of the aldehyde oxygen atom in cocrystals of aromatic aldehydes and 1,4-diiodotetrafluorobenzene
Source: Royal Society of Chemistry journal article supplement (doi:10.1039/c9ce00340a), 2019-01-01
Supplement: c9ce00340a1.pdf [file c9ce00340a1.pdf]

## SUPPORTING INFORMATION

# Halogen bonding of the aldehyde oxygen atom in cocrystals of aromatic aldehydes and 1,4-diiodotetrafluorobenzene

Vinko Nemec, Luka Fotović, Toni Vitasović and Dominik Cinčić

*Department of Chemistry, Faculty of Science, University of Zagreb, Horvatovac 102a,  
HR-10000 Zagreb, Croatia*

Email: dominik@chem.pmf.hr

Fax: +385 1 4606 341

Tel: +385 1 4606 362

### Table of Contents

|                             |                                                                                                                                                                                                                                   |    |
|-----------------------------|-----------------------------------------------------------------------------------------------------------------------------------------------------------------------------------------------------------------------------------|----|
| <b>Experimental details</b> | Mechanochemical syntheses, solution syntheses, thermal analysis, powder X-ray diffraction experiments, single crystal X-ray diffraction experiments                                                                               | 3  |
| <b>Table S1.</b>            | Crystal data and refinement details for the prepared metal cocrystals.                                                                                                                                                            | 6  |
| <b>Figure S1.</b>           | Molecular structure of <b>(dmab)<sub>2</sub>(tfib)</b> showing the atom-labelling scheme. Displacement ellipsoids are drawn at the 50 % probability level, and H atoms are shown as small spheres of arbitrary radius.            | 8  |
| <b>Figure S2.</b>           | Molecular structure of <b>(napht)<sub>2</sub>(tfib)</b> showing the atom-labelling scheme. Displacement ellipsoids are drawn at the 50 % probability level, and H atoms are shown as small spheres of arbitrary radius.           | 8  |
| <b>Figure S3.</b>           | Molecular structure of <b>(dmb)<sub>2</sub>(tfib)</b> showing the atom-labelling scheme. Displacement ellipsoids are drawn at the 50 % probability level, and H atoms are shown as small spheres of arbitrary radius.             | 9  |
| <b>Figure S4.</b>           | Molecular structure of <b>(van)(tfib)</b> showing the atom-labelling scheme. Displacement ellipsoids are drawn at the 50 % probability level, and H atoms are shown as small spheres of arbitrary radius.                         | 9  |
| <b>Figure S5.</b>           | Molecular structure of <b>(pca)(tfib)</b> showing the atom-labelling scheme. Displacement ellipsoids are drawn at the 50 % probability level, and H atoms are shown as small spheres of arbitrary radius.                         | 10 |
| <b>Figure S6.</b>           | PXRD pattern of <b>tfib</b> .                                                                                                                                                                                                     | 11 |
| <b>Figure S7</b>            | PXRD pattern of <b>dmab</b> .                                                                                                                                                                                                     | 11 |
| <b>Figure S8.</b>           | PXRD pattern of <b>napht</b> .                                                                                                                                                                                                    | 12 |
| <b>Figure S9.</b>           | PXRD pattern of <b>dmb</b> .                                                                                                                                                                                                      | 12 |
| <b>Figure S10.</b>          | PXRD pattern of <b>van</b> .                                                                                                                                                                                                      | 13 |
| <b>Figure S11.</b>          | PXRD patterns of: a) <b>tfib</b> , b) <b>dmab</b> , c) product obtained by grinding <b>tfib</b> and <b>dmab</b> in a 1:2 stoichiometric ratio, d) calculated pattern from <b>(dmab)<sub>2</sub>(tfib)</b> single crystal data.    | 13 |
| <b>Figure S12.</b>          | PXRD patterns of: a) <b>tfib</b> , b) <b>napht</b> , c) product obtained by grinding <b>tfib</b> and <b>napht</b> in a 1:2 stoichiometric ratio, d) calculated pattern from <b>(napht)<sub>2</sub>(tfib)</b> single crystal data. | 14 |
| <b>Figure S13.</b>          | PXRD patterns of: a) <b>tfib</b> , b) <b>dmb</b> , c) product obtained by grinding <b>tfib</b> and <b>dmb</b> in a 1:2 stoichiometric ratio, d) calculated pattern from <b>(dmb)<sub>2</sub>(tfib)</b> single crystal data.       | 14 |
| <b>Figure S14.</b>          | PXRD patterns of: a) <b>tfib</b> , b) <b>van</b> , c) product obtained by grinding <b>tfib</b> and <b>van</b> in a 1:1 stoichiometric ratio for 15 minutes, d) product obtained by heating the                                    | 15 |

grinding product (c) at 85 °C for 15 minutes, e) product obtained by heating the grinding product (c) at 90 °C for 15 minutes, f) product obtained by grinding **tfib** and **van** in a 1:1 stoichiometric ratio for 90 minutes, f) calculated pattern from (**van**)(**tfib**) single crystal data.

|                    |                                                                                                                                                                                                            |    |
|--------------------|------------------------------------------------------------------------------------------------------------------------------------------------------------------------------------------------------------|----|
| <b>Figure S15.</b> | PXRD patterns of: a) <b>tfib</b> , b) product obtained by grinding <b>tfib</b> and <b>pca</b> in a 1:1 stoichiometric ratio, c) calculated pattern from ( <b>pca</b> )( <b>tfib</b> ) single crystal data. | 15 |
| <b>Figure S16.</b> | DSC curve of <b>tfib</b> .                                                                                                                                                                                 | 16 |
| <b>Figure S17.</b> | DSC curve of <b>dmab</b> .                                                                                                                                                                                 | 16 |
| <b>Figure S18.</b> | DSC curve of <b>napht</b> .                                                                                                                                                                                | 17 |
| <b>Figure S19.</b> | DSC curve of <b>dmb</b> .                                                                                                                                                                                  | 17 |
| <b>Figure S20.</b> | DSC curve of <b>van</b> .                                                                                                                                                                                  | 18 |
| <b>Figure S21.</b> | DSC curve of ( <b>dmab</b> ) <sub>2</sub> ( <b>tfib</b> ).                                                                                                                                                 | 18 |
| <b>Figure S22.</b> | DSC curve of ( <b>napht</b> ) <sub>2</sub> ( <b>tfib</b> ).                                                                                                                                                | 19 |
| <b>Figure S23.</b> | DSC curve of ( <b>dmb</b> ) <sub>2</sub> ( <b>tfib</b> ).                                                                                                                                                  | 19 |
| <b>Figure S24.</b> | DSC curve of ( <b>van</b> )( <b>tfib</b> ).                                                                                                                                                                | 20 |
| <b>Figure S25.</b> | DSC curve of ( <b>pca</b> )( <b>tfib</b> ).                                                                                                                                                                | 20 |

## EXPERIMENTAL DETAILS

### MECHANOCHEMICAL SYNTHESSES

#### Synthesis of (dmab)<sub>2</sub>(tfib)

A mixture of **dmab** (74.2 mg, 497  $\mu\text{mol}$ ) and **tfib** (99.9 mg, 248  $\mu\text{mol}$ ) was placed in a 10 mL stainless steel jar along with 25  $\mu\text{L}$  of acetonitrile and two stainless steel balls 7 mm in diameter. The reaction mixture was then milled for 20 minutes in a Retsch MM200 Shaker Mill operating at 25 Hz.

#### Synthesis of (napht)<sub>2</sub>(tfib)

A mixture of **napht** (13.2 mg, 76.7  $\mu\text{mol}$ ) and **tfib** (30.9 mg, 76.8  $\mu\text{mol}$ ) was placed in a 10 mL stainless steel jar along with 10  $\mu\text{L}$  of acetone and two stainless steel balls 7 mm in diameter. The reaction mixture was then milled for 15 minutes in a Retsch MM200 Shaker Mill operating at 25 Hz.

#### Synthesis of (dmb)<sub>2</sub>(tfib)

A mixture of **dmb** (40.0 mg, 240  $\mu\text{mol}$ ) and **tfib** (48.4 mg, 120  $\mu\text{mol}$ ) was placed in a 10 mL stainless steel jar along with 20  $\mu\text{L}$  of nitromethane and two stainless steel balls 7 mm in diameter. The reaction mixture was then milled for 15 minutes in a Retsch MM200 Shaker Mill operating at 25 Hz.

#### Synthesis of (pca)(tfib)

A mixture of **pca** (10.0  $\mu\text{L}$ , 106  $\mu\text{mol}$ ) and **tfib** (40.2 mg, 100  $\mu\text{mol}$ ) was placed in a 10 mL stainless steel jar along with two stainless steel balls 7 mm in diameter. The reaction mixture was then milled for 15 minutes in a Retsch MM200 Shaker Mill operating at 25 Hz.

#### Synthesis of (van)(tfib)

A mixture of **van** (20.0 mg, 131  $\mu\text{mol}$ ) and **tfib** (52.8 mg, 131  $\mu\text{mol}$ ) was placed in a 10 mL stainless steel jar along with 40  $\mu\text{L}$  of nitromethane and a stainless steel ball 12 mm in diameter. The reaction mixture was then milled for 90 minutes in a Retsch MM200 Shaker Mill operating at 25 Hz.

## SOLUTION SYNTHESSES

### Synthesis of (dmab)<sub>2</sub>(tfib)

A mixture of **dmab** (12.8 mg, 85.8  $\mu\text{mol}$ ) and **tfib** (17.2 mg, 42.8  $\mu\text{mol}$ ) was dissolved in 1.0 mL of hot tetrahydrofuran and left to crystallize at room temperature.

### Solution synthesis of (napht)<sub>2</sub>(tfib)

A mixture of **napht** (20.0 mg, 116  $\mu\text{mol}$ ) and **tfib** (23.3 mg, 58.0  $\mu\text{mol}$ ) was dissolved in 1.0 mL of hot methanol and left to crystallize at room temperature.

### Synthesis of (dmb)<sub>2</sub>(tfib)

A mixture of **dmb** (10.0 mg, 60.2  $\mu\text{mol}$ ) and **tfib** (24.2 mg, 60.2  $\mu\text{mol}$ ) was dissolved in 1.0 mL of hot nitromethane and left to crystallize at room temperature.

### Solution synthesis of (pca)(tfib)

A mixture of **pca** (10.0  $\mu\text{L}$ , 106  $\mu\text{mol}$ ) and **tfib** (40.2 mg, 100  $\mu\text{mol}$ ) was dissolved in 1.0 mL of hot acetone and left to crystallize at room temperature.

### Synthesis of (van)(tfib)

A mixture of **van** (40.0 mg, 262  $\mu\text{mol}$ ) and **tfib** (105.6 mg, 262  $\mu\text{mol}$ ) was dissolved in 1.5 mL of hot methanol and left to crystallize at room temperature.

## THERMAL ANALYSIS

DSC measurements were performed on a Mettler-Toledo DSC823<sup>e</sup> module. The samples were placed in sealed aluminium pans (40  $\mu\text{L}$ ) with three holes made on the top cover, and heated in flowing nitrogen (150 mL min<sup>-1</sup>) from 25 °C to 500 °C at a rate of 10 °C min<sup>-1</sup>. The data collection and analysis was performed using the program package STAR<sup>e</sup> Software 15.00.<sup>1</sup>

## POWDER X-RAY DIFFRACTION EXPERIMENTS

PXRD experiments were performed on a PHILIPS PW 1840 X-ray diffractometer with CuK $\alpha$ 1 (1.54056 Å) radiation at 40 mA and 40 kV. The scattered intensities were measured with a scintillation counter. The angular range was from 5 to 40° (2 $\theta$ ) with steps of 0.02 – 0.03°, and the measuring time was 0.2 – 0.5 s per step. Data collection and analysis was performed using the program package Philips X'Pert.<sup>2</sup>

## SINGLE-CRYSTAL X-RAY DIFFRACTION EXPERIMENTS

The crystal and molecular structures of the prepared samples were determined by single crystal X-ray diffraction. Details of data collection and crystal structure refinement are listed in Table S1. The diffraction data were collected at 295 K, except for the **(pca)(tfib)** cocrystal which decomposes at room temperature and its data was therefore collected at 150 K. Diffraction measurements were made on an Oxford Diffraction Xcalibur Kappa CCD X-ray diffractometer with graphite-monochromated MoK $\alpha$  ( $\lambda = 0.71073\text{\AA}$ ) radiation. The data sets were collected using the  $\omega$  scan mode over the  $2\theta$  range up to  $54^\circ$ . Programs CrysAlis CCD and CrysAlis RED were employed for data collection, cell refinement, and data reduction.<sup>3</sup> The structures were solved by direct methods and refined using the SHELXS, SHELXT and SHELXL programs, respectively.<sup>4, 5</sup> The structural refinement was performed on  $F^2$  using all data. Alykl, aryl and hydroxyl group hydrogen atoms were placed in calculated positions and treated as riding on their parent atoms. All calculations were performed using the WINGX crystallographic suite of programs.<sup>6</sup> The molecular structures of compounds and their molecular packing projections were prepared by Mercury.<sup>7</sup>

### References

1. STARe Evaluation Software Version 15.00, Mettler–Toledo GmbH, 2016.
2. Philips X'Pert Data Collector 1.3e, Philips Analytical B. V. Netherlands, 2001; Philips X'Pert Graphic & Identify 1.3e Philips Analytical B. V. Netherlands, 2001; Philips X'Pert Plus 1.0, Philips Analytical B. V. Netherlands, 1999.
3. Oxford Diffraction, Oxford Diffraction Ltd., Xcalibur CCD system, CrysAlis CCD and CrysAlis RED software, Version 1.170, 2003.
4. (a) G. M. Sheldrick, *Acta Cryst. A*, 2008, **64**, 112–122; (b) G. M. Sheldrick, *Acta Cryst. C*, 2015, **71**, 3–8.
5. G. M. Sheldrick, *Acta Cryst. A*, 2015, **71**, 3–8.
6. L. J. Farrugia, *J. Appl. Cryst.*, 2012, **45**, 849–854.
7. C. F. Macrae, I. J. Bruno, J. A. Chisholm, P. R. Edgington, P. McCabe, E. Pidcock, L. Rodriguez-Monge, R. Taylor, J. v. d. Streek and P. A. Wood, *J. Appl. Crystallogr.* **2008**, 41, 466.

**Table S1.** Crystal data and refinement details for the prepared cocrystals.

|                                                                        | <b>(dmab)<sub>2</sub>(tfib)</b>                                                             | <b>(napht)<sub>2</sub>(tfib)</b>                                             | <b>(dmb)<sub>2</sub>(tfib)</b>                                               |
|------------------------------------------------------------------------|---------------------------------------------------------------------------------------------|------------------------------------------------------------------------------|------------------------------------------------------------------------------|
| Molecular formula                                                      | C <sub>24</sub> H <sub>22</sub> F <sub>4</sub> I <sub>2</sub> N <sub>2</sub> O <sub>2</sub> | C <sub>28</sub> H <sub>16</sub> F <sub>4</sub> I <sub>2</sub> O <sub>4</sub> | C <sub>24</sub> H <sub>20</sub> F <sub>4</sub> I <sub>2</sub> O <sub>6</sub> |
| $M_r$                                                                  | 700.23                                                                                      | 746.21                                                                       | 734.20                                                                       |
| Crystal system                                                         | triclinic                                                                                   | monoclinic                                                                   | monoclinic                                                                   |
| Space group                                                            | $P\bar{1}$                                                                                  | $P 2_1/n$                                                                    | $P 2_1/n$                                                                    |
| Crystal data:                                                          |                                                                                             |                                                                              |                                                                              |
| $a / \text{\AA}$                                                       | 8.1668(5)                                                                                   | 9.8371(8)                                                                    | 8.2542(3)                                                                    |
| $b / \text{\AA}$                                                       | 8.4423(6)                                                                                   | 12.5539(10)                                                                  | 15.3640(5)                                                                   |
| $c / \text{\AA}$                                                       | 10.8612(5)                                                                                  | 21.3222(15)                                                                  | 10.5028(5)                                                                   |
| $\alpha / ^\circ$                                                      | 100.288(5)                                                                                  | 90                                                                           | 90                                                                           |
| $\beta / ^\circ$                                                       | 105.696(5)                                                                                  | 96.397(7)                                                                    | 106.955(4)                                                                   |
| $\gamma / ^\circ$                                                      | 110.297(6)                                                                                  | 90                                                                           | 90                                                                           |
| $V / \text{\AA}^3$                                                     | 644.64(7)                                                                                   | 2616.8(4)                                                                    | 1274.04(9)                                                                   |
| $Z$                                                                    | 1                                                                                           | 4                                                                            | 2                                                                            |
| $D_{\text{calc}} / \text{g cm}^{-3}$                                   | 1.804                                                                                       | 1.894                                                                        | 1.914                                                                        |
| $\lambda(\text{MoK}\alpha) / \text{\AA}$                               | 0.71073                                                                                     | 0.71073                                                                      | 0.71073                                                                      |
| $T / \text{K}$                                                         | 295                                                                                         | 295                                                                          | 295                                                                          |
| Crystal size / mm <sup>3</sup>                                         | 0.51 x 0.49 x 0.16                                                                          | 0.50 x 0.25 x 0.09                                                           | 0.50 x 0.21 x 0.10                                                           |
| $\mu / \text{mm}^{-1}$                                                 | 2.491                                                                                       | 2.465                                                                        | 2.535                                                                        |
| $F(000)$                                                               | 338                                                                                         | 1432                                                                         | 708                                                                          |
| Refl.<br>collected/unique                                              | 6447 / 2799                                                                                 | 16565 / 5691                                                                 | 13910 / 2778                                                                 |
| Data/restraints/<br>parameters                                         | 156                                                                                         | 345                                                                          | 165                                                                          |
| $\Delta\rho_{\text{max}}, \Delta\rho_{\text{min}} / \text{e \AA}^{-3}$ | 0.471; -0.453                                                                               | 1.420; -0.946                                                                | 0.292; -0.603                                                                |
| $R[F^2 > 4\sigma(F^2)]$                                                | 0.0308                                                                                      | 0.060                                                                        | 0.0238                                                                       |
| $wR(F^2)$                                                              | 0.0773                                                                                      | 0.133                                                                        | 0.0644                                                                       |
| Goodness-of-fit, $S$                                                   | 1.143                                                                                       | 1.124                                                                        | 1.050                                                                        |

**Table S1.** Continued.

|                                                                        | (van)(tfib)                                                                 | (pca)(tfib)                                                     |
|------------------------------------------------------------------------|-----------------------------------------------------------------------------|-----------------------------------------------------------------|
| Molecular formula                                                      | C <sub>14</sub> H <sub>8</sub> F <sub>4</sub> I <sub>2</sub> O <sub>4</sub> | C <sub>12</sub> H <sub>5</sub> F <sub>4</sub> I <sub>2</sub> NO |
| $M_r$                                                                  | 554.00                                                                      | 508.97                                                          |
| Crystal system                                                         | monoclinic                                                                  | triclinic                                                       |
| Space group                                                            | $P 2_1/c$                                                                   | $P -1$                                                          |
| Crystal data:                                                          |                                                                             |                                                                 |
| $a / \text{\AA}$                                                       | 7.6135(5)                                                                   | 4.2934(3)                                                       |
| $b / \text{\AA}$                                                       | 28.680(2)                                                                   | 6.2651(4)                                                       |
| $c / \text{\AA}$                                                       | 7.4414(7)                                                                   | 13.2828(8)                                                      |
| $\alpha / ^\circ$                                                      | 90                                                                          | 101.118(5)                                                      |
| $\beta / ^\circ$                                                       | 98.956(7)                                                                   | 96.900(5)                                                       |
| $\gamma / ^\circ$                                                      | 90                                                                          | 98.117(5)                                                       |
| $V / \text{\AA}^3$                                                     | 1605.1(2)                                                                   | 343.05(4)                                                       |
| $Z$                                                                    | 4                                                                           | 1                                                               |
| $D_{\text{calc}} / \text{g cm}^{-3}$                                   | 2.293                                                                       | 2.464                                                           |
| $\lambda(\text{MoK}\alpha) / \text{\AA}$                               | 0.71073                                                                     | 0.71073                                                         |
| $T / \text{K}$                                                         | 295                                                                         | 150                                                             |
| Crystal size / mm <sup>3</sup>                                         | 0.52 x 0.26 x 0.23                                                          | 0.48 x 0.20 x 0.06                                              |
| $\mu / \text{mm}^{-1}$                                                 | 3.970                                                                       | 4.623                                                           |
| $F(000)$                                                               | 1032                                                                        | 234                                                             |
| Refl. collected/unique                                                 | 10189 / 3498                                                                | 2287 / 1462                                                     |
| Data/restraints/<br>parameters                                         | 209                                                                         | 112                                                             |
| $\Delta\rho_{\text{max}}, \Delta\rho_{\text{min}} / \text{e \AA}^{-3}$ | 0.536; -1.050                                                               | 1.179; -2.195                                                   |
| $R[F^2 > 4\sigma(F^2)]$                                                | 0.0558                                                                      | 0.0361                                                          |
| $wR(F^2)$                                                              | 0.1215                                                                      | 0.1042                                                          |
| Goodness-of-fit, $S$                                                   | 1.196                                                                       | 1.137                                                           |

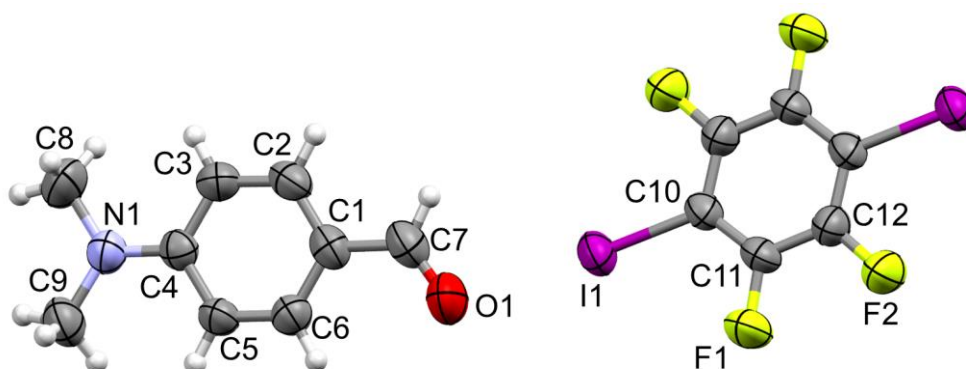

**Figure S1.** Molecular structure of **(dmab)<sub>2</sub>(tfib)** showing the atom-labelling scheme. Displacement ellipsoids are drawn at the 50 % probability level, and H atoms are shown as small spheres of arbitrary radius.

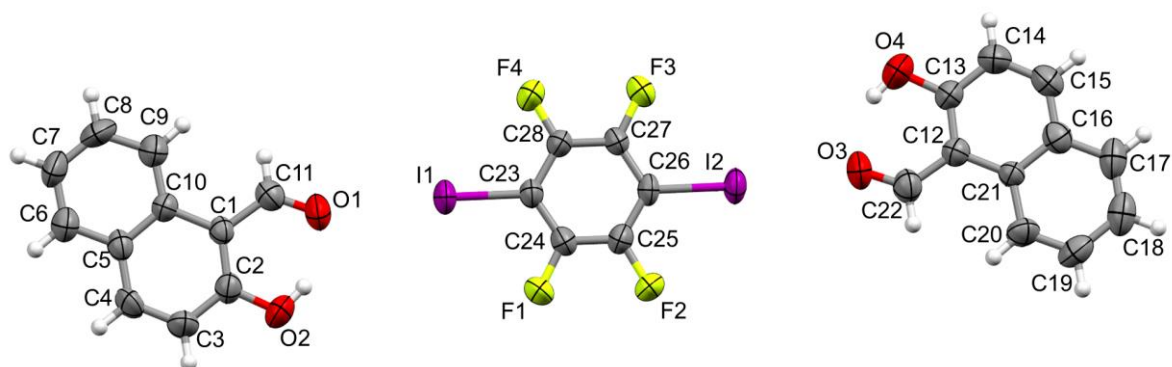

**Figure S2.** Molecular structure of **(napht)<sub>2</sub>(tfib)** showing the atom-labelling scheme. Displacement ellipsoids are drawn at the 50 % probability level, and H atoms are shown as small spheres of arbitrary radius.



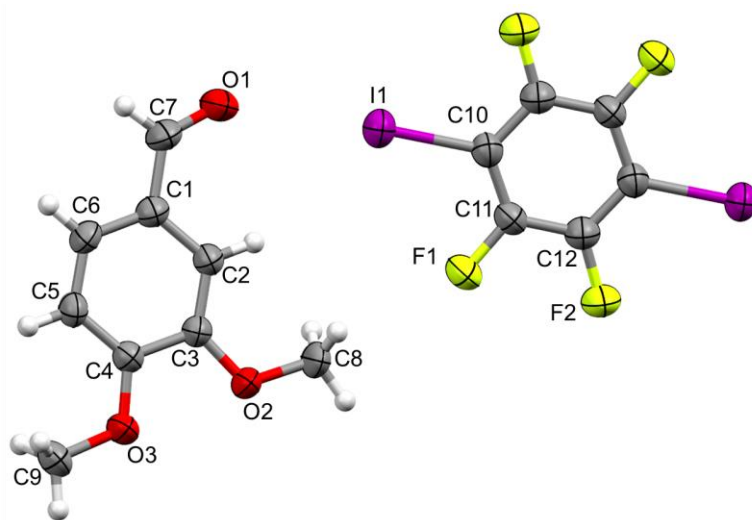

**Figure S3.** Molecular structure of **(dmb)<sub>2</sub>(tfib)** showing the atom-labelling scheme. Displacement ellipsoids are drawn at the 50 % probability level, and H atoms are shown as small spheres of arbitrary radius.

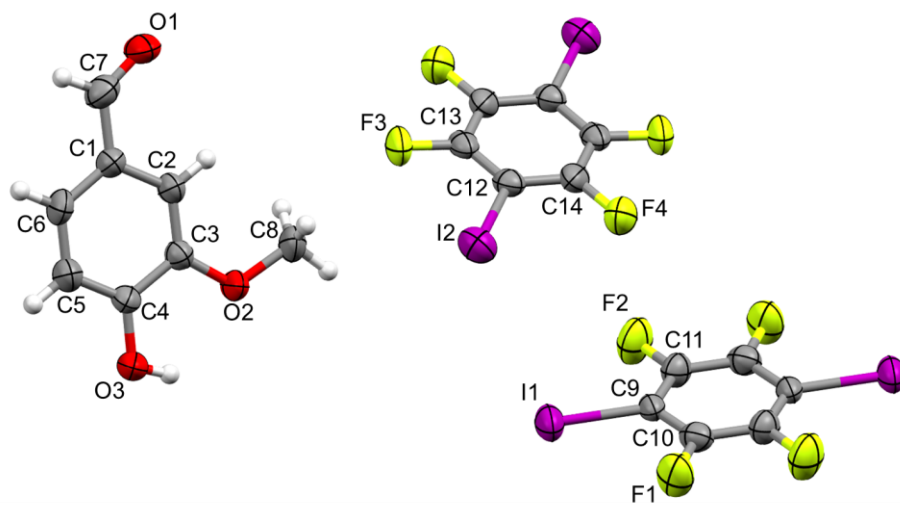

**Figure S4.** Molecular structure of **(van)(tfib)** showing the atom-labelling scheme. Displacement ellipsoids are drawn at the 50 % probability level, and H atoms are shown as small spheres of arbitrary radius.

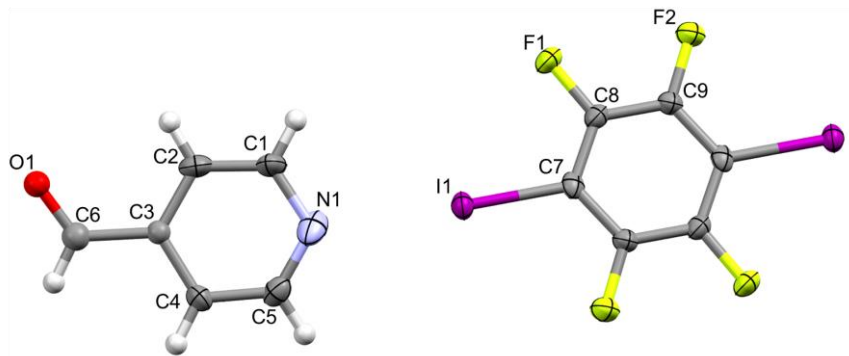

**Figure S5.** Molecular structure of **(pca)(tfib)** showing the atom-labelling scheme. Displacement ellipsoids are drawn at the 50 % probability level, and H atoms are shown as small spheres of arbitrary radius.

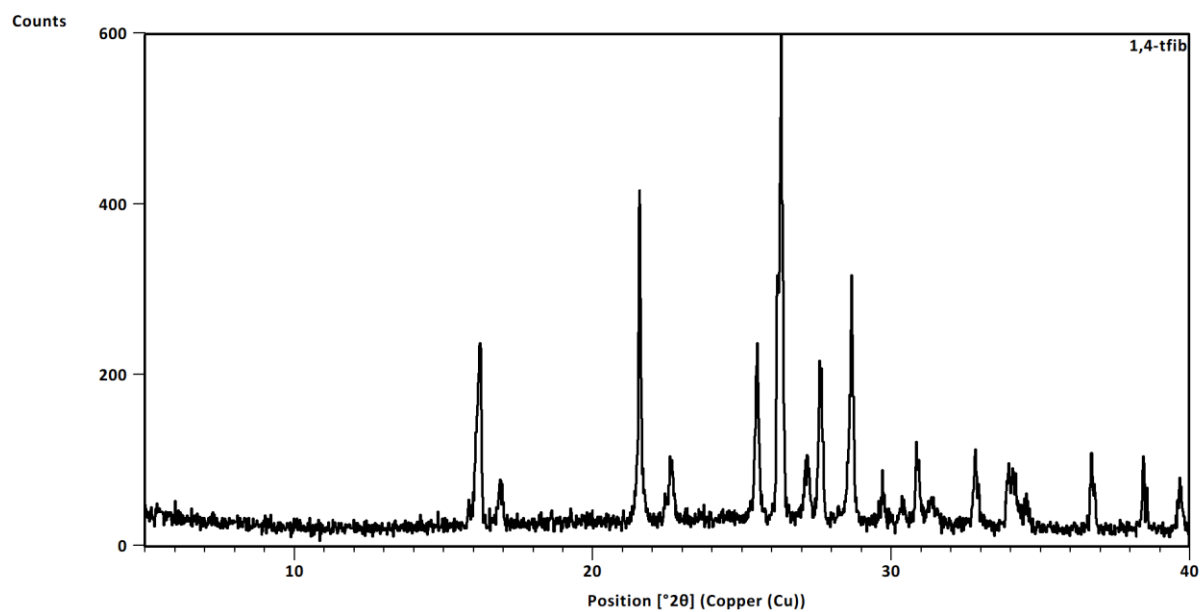

**Figure S6.** PXRD pattern of **tfib**.

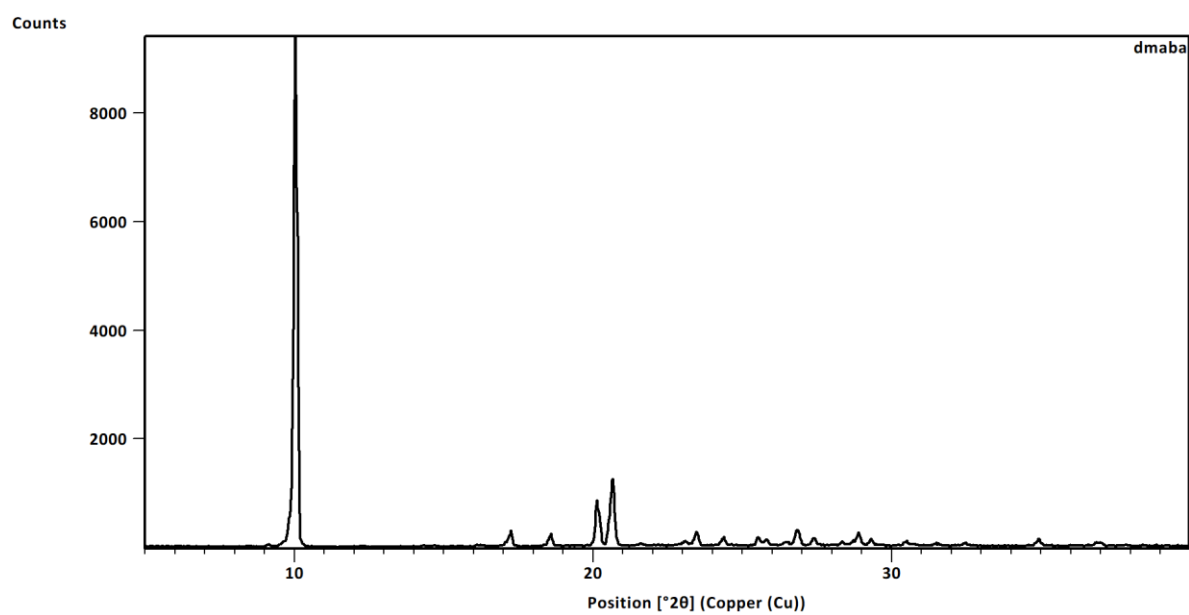

**Figure S7.** PXRD pattern of **dmab**.

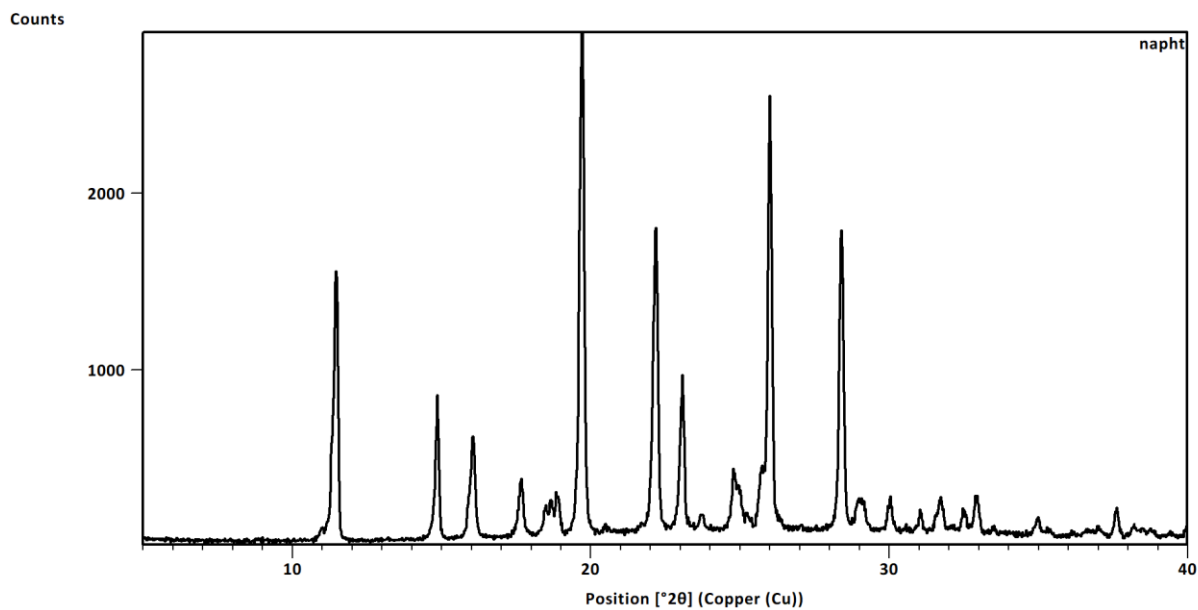

**Figure S8.** PXRD pattern of **napht**.

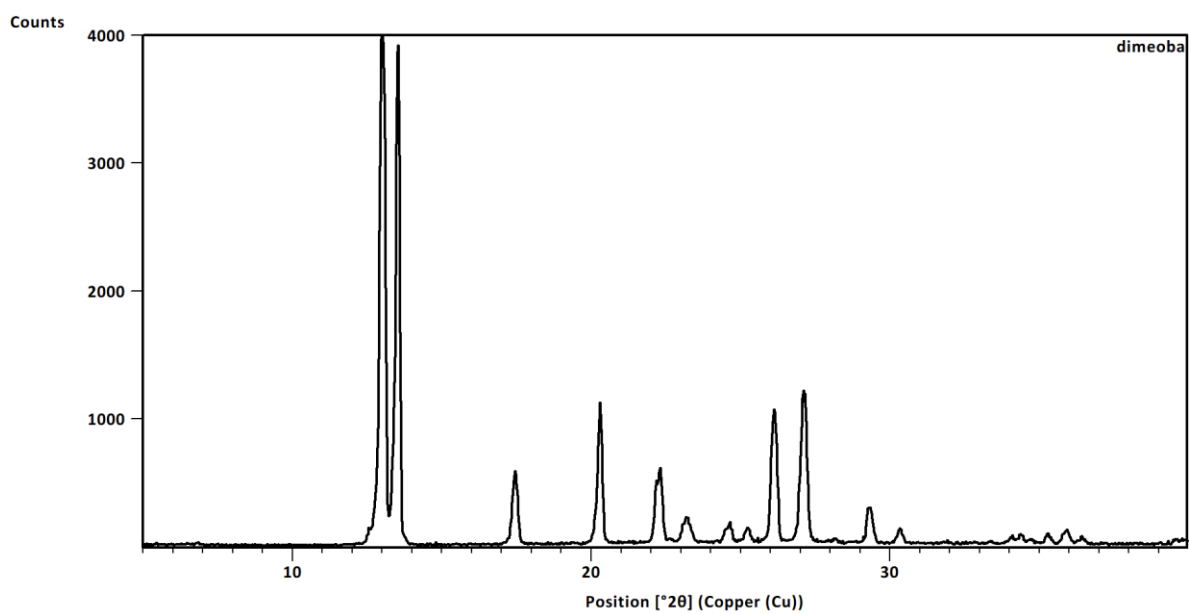

**Figure S9.** PXRD pattern of **dmb**.

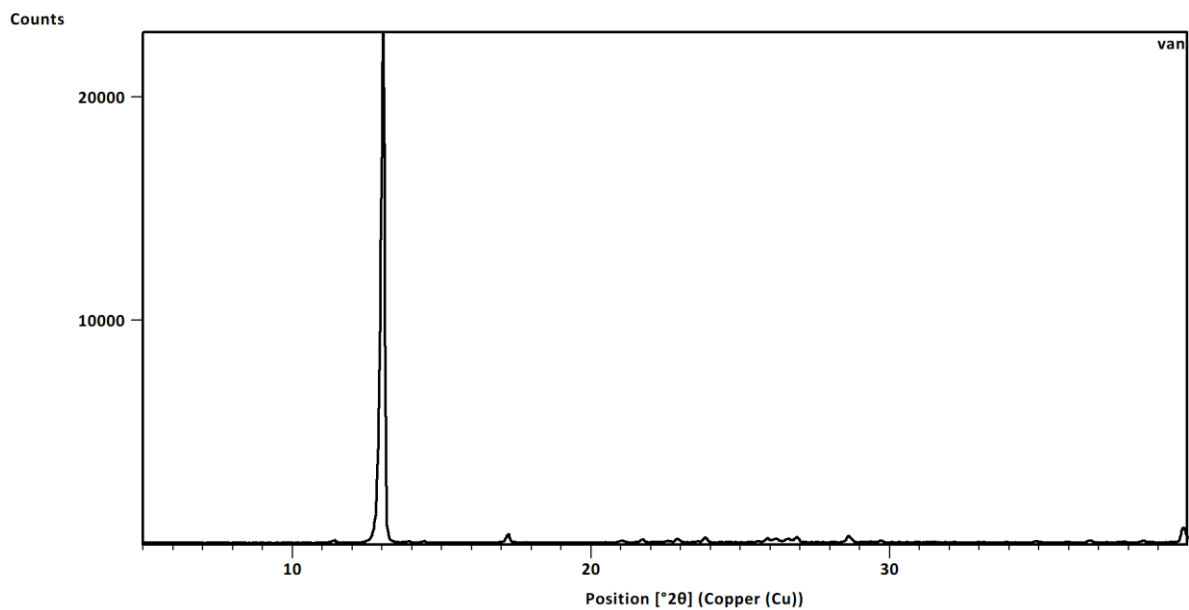

**Figure S10.** PXRD pattern of **van**.

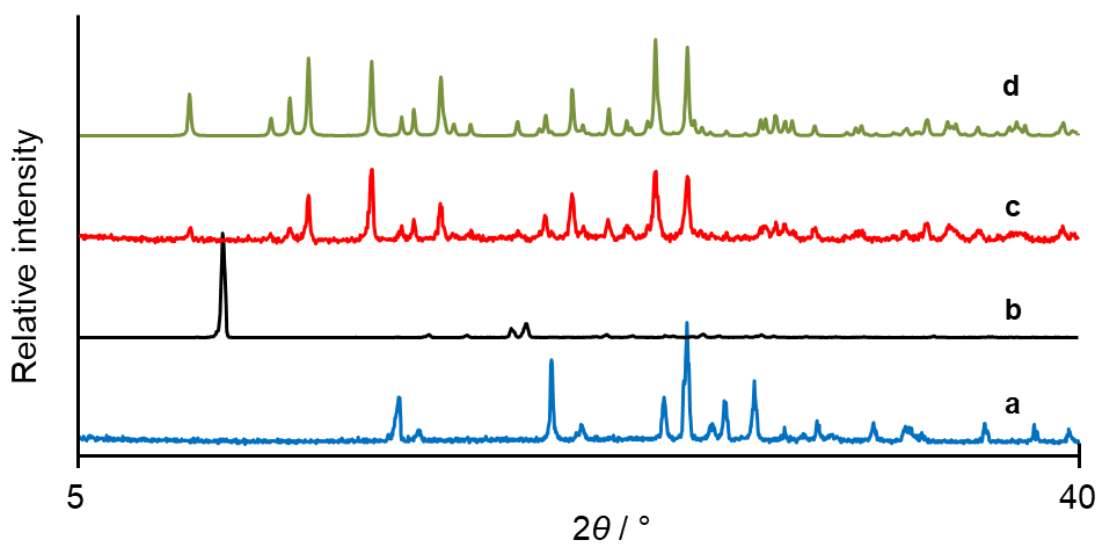

**Figure S11.** PXRD patterns of: a) **tfib**, b) **dmab**, c) product obtained by grinding **tfib** and **dmab** in a 1:2 stoichiometric ratio, d) calculated pattern from **(dmab)<sub>2</sub>(tfib)** single crystal data.

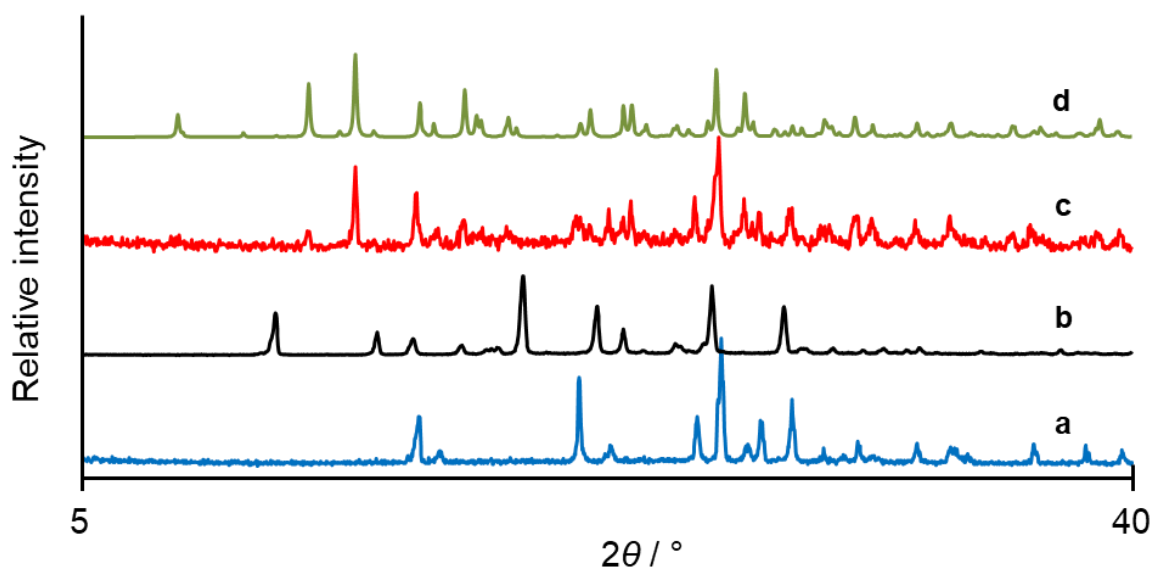

**Figure S12.** PXRD patterns of: a) **tfib**, b) **napht**, c) product obtained by grinding **tfib** and **napht** in a 1:2 stoichiometric ratio, d) calculated pattern from **(napht)<sub>2</sub>(tfib)** single crystal data

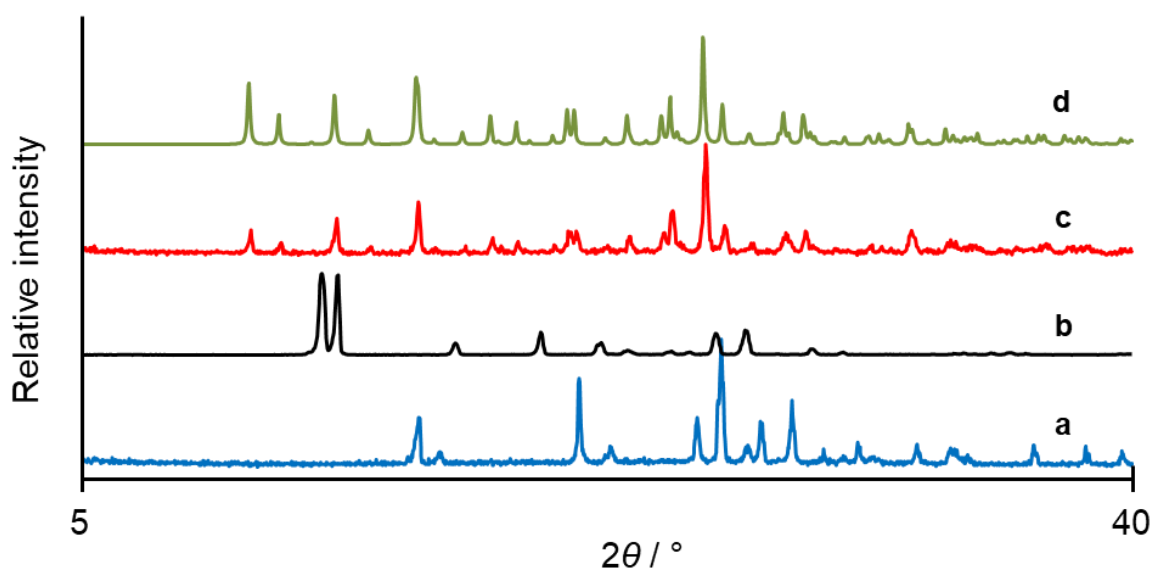

**Figure S13.** PXRD patterns of: a) **tfib**, b) **dmb**, c) product obtained by grinding **tfib** and **dmb** in a 1:2 stoichiometric ratio, d) calculated pattern from **(dmb)<sub>2</sub>(tfib)** single crystal data.

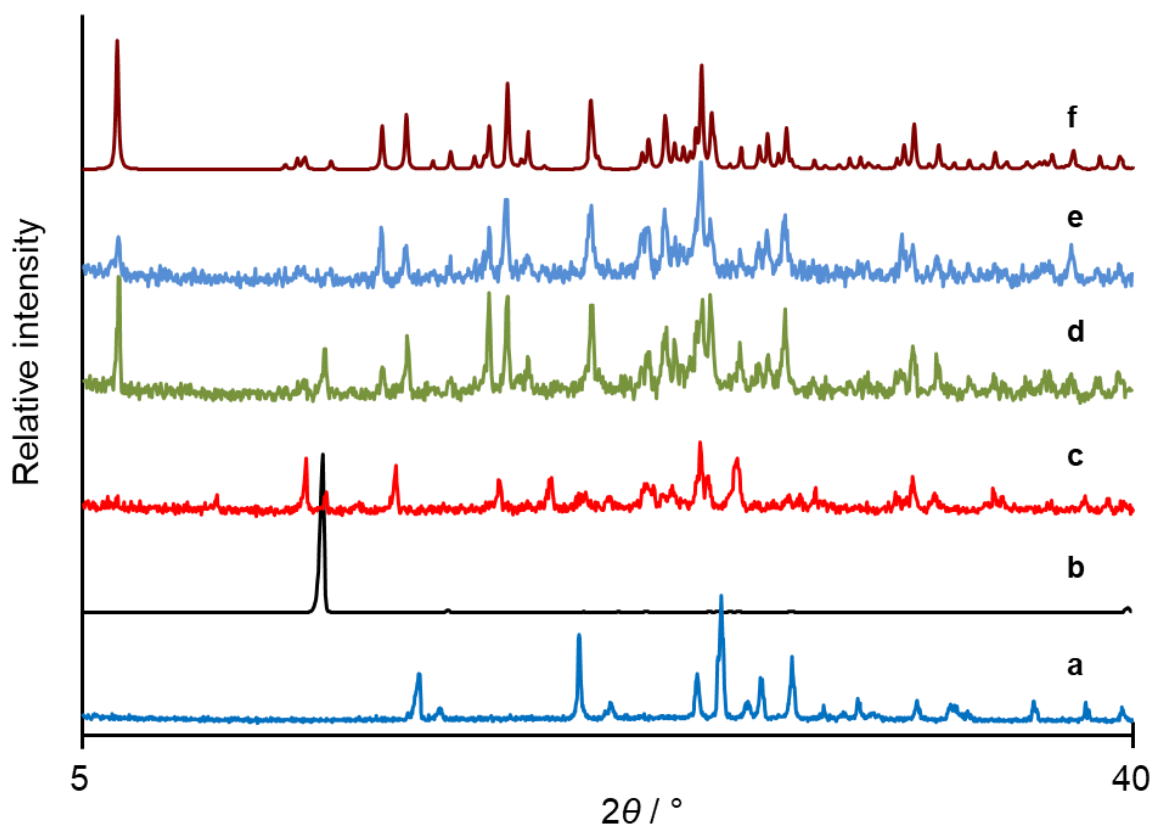

**Figure S14.** PXRD patterns of: a) **tfib**, b) **van**, c) product obtained by grinding **tfib** and **van** in a 1:1 stoichiometric ratio for 15 minutes, d) product obtained by heating the grinding product (c) at 90 °C for 15 minutes, e) product obtained by grinding **tfib** and **van** in a 1:1 stoichiometric ratio for 90 minutes, f) calculated pattern from (**van**)(**tfib**) single crystal data.

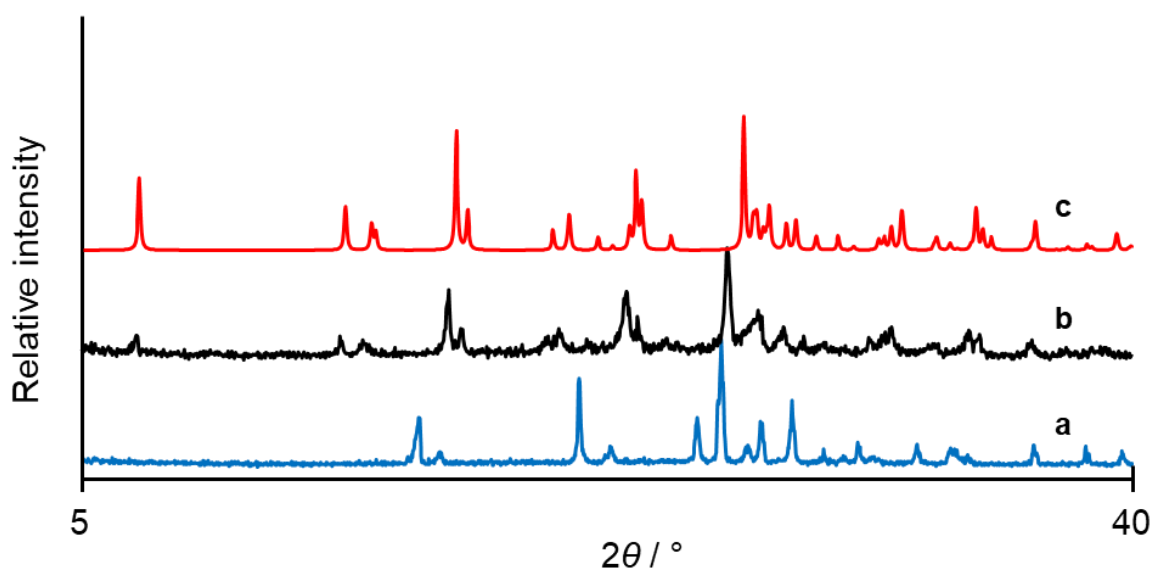

**Figure S15.** PXRD patterns of: a) **tfib**, b) product obtained by grinding **tfib** and **pca** in a 1:1 stoichiometric ratio, c) calculated pattern from (**pca**)(**tfib**) single crystal data.

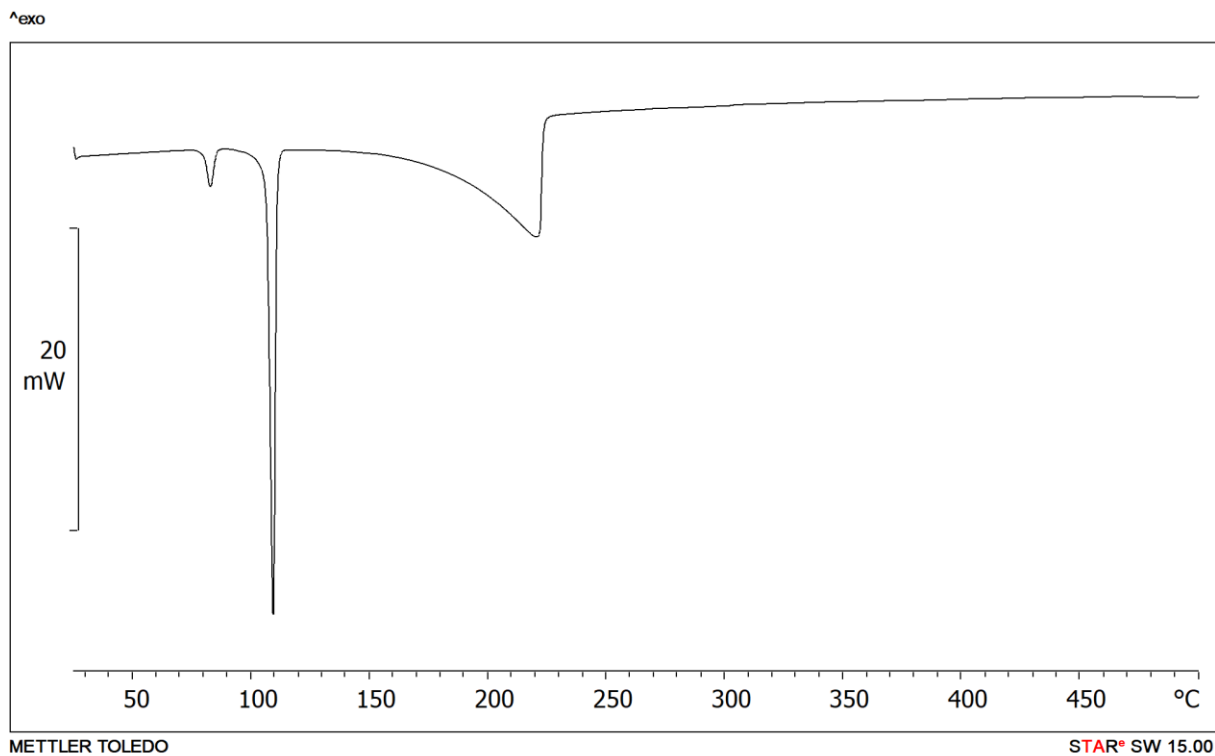

**Figure S16.** DSC curve of **tfib**.

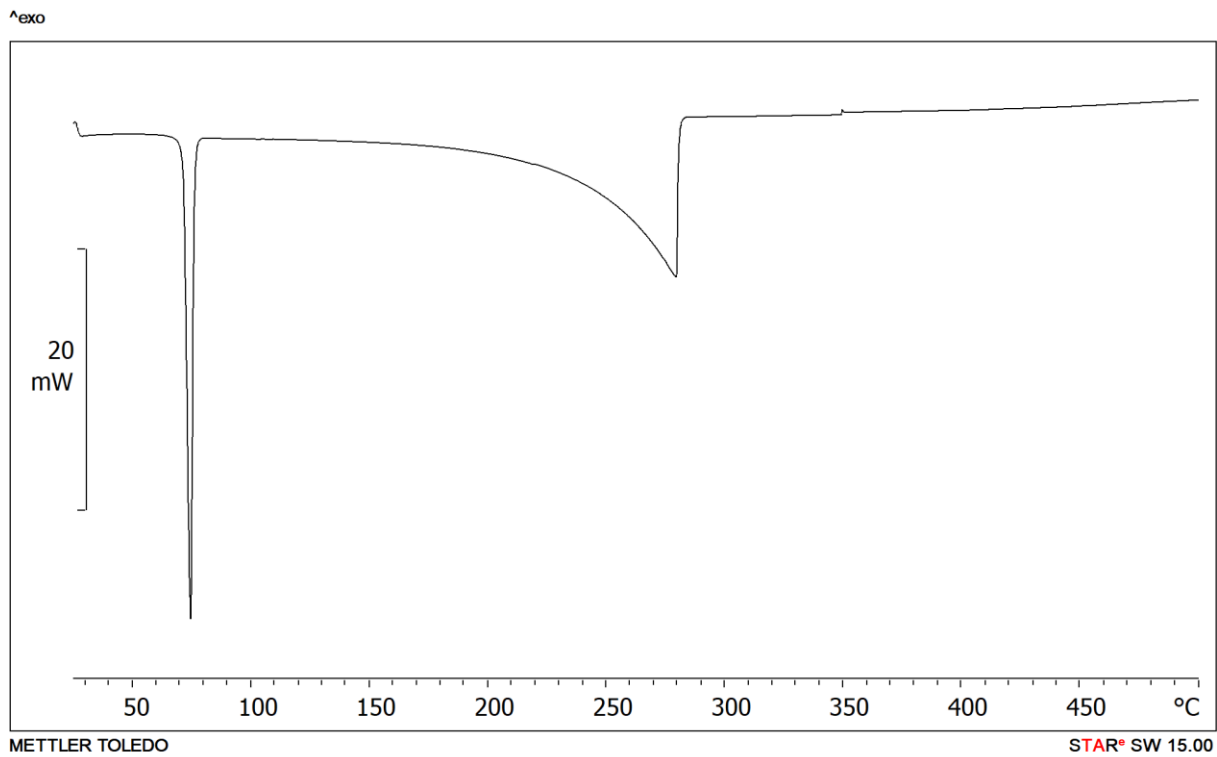

**Figure S17.** DSC curve of **dmab**.



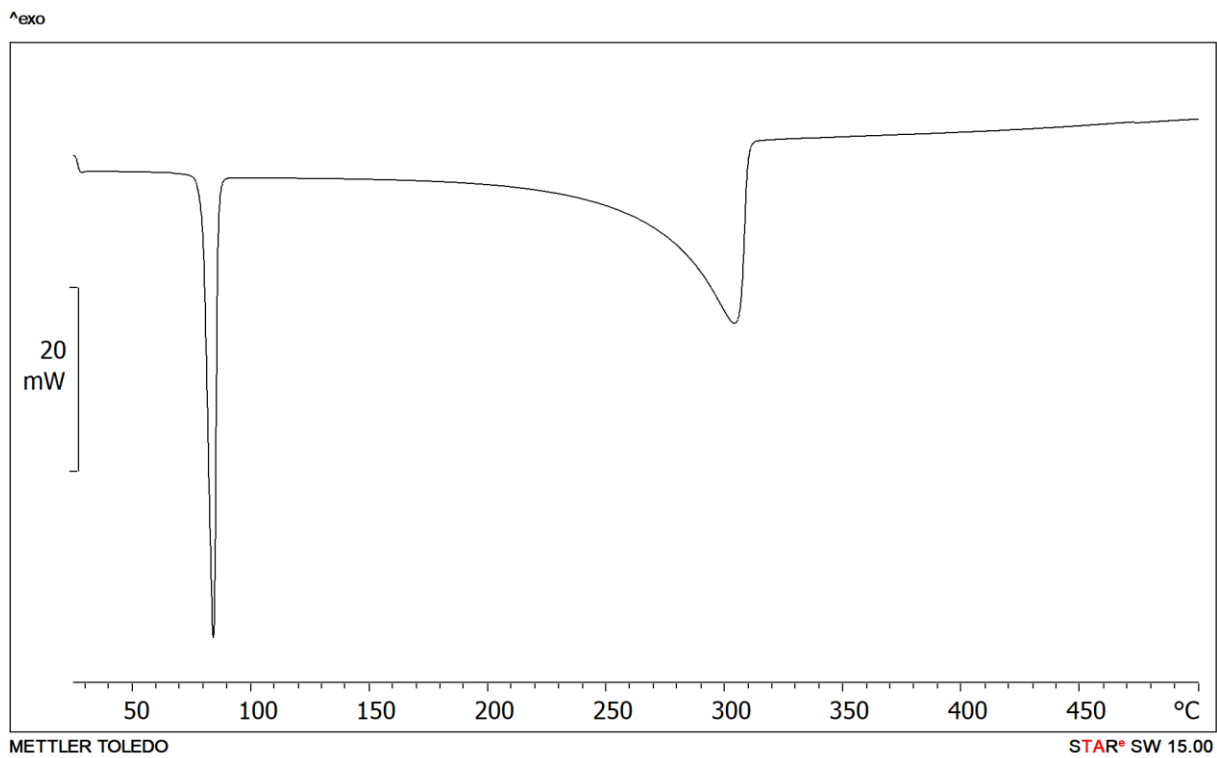

**Figure S18.** DSC curve of **napht.**

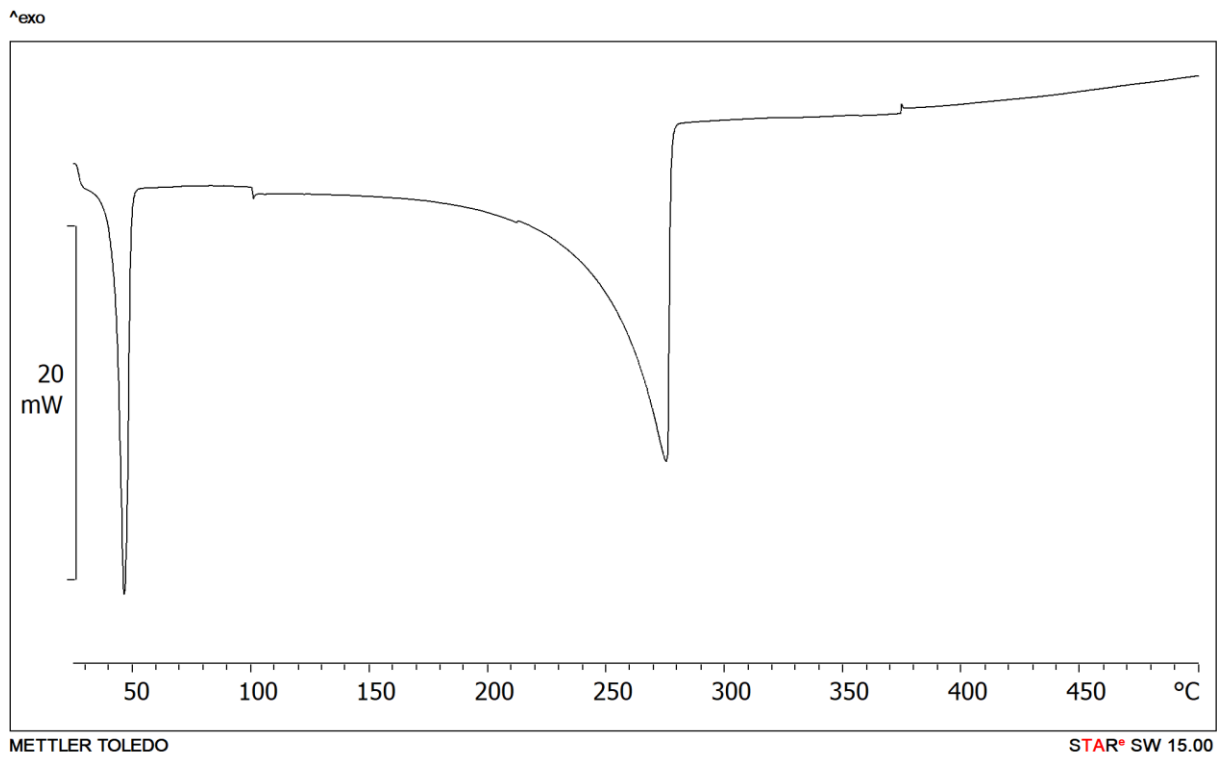

**Figure S19.** DSC curve of **dmb.**

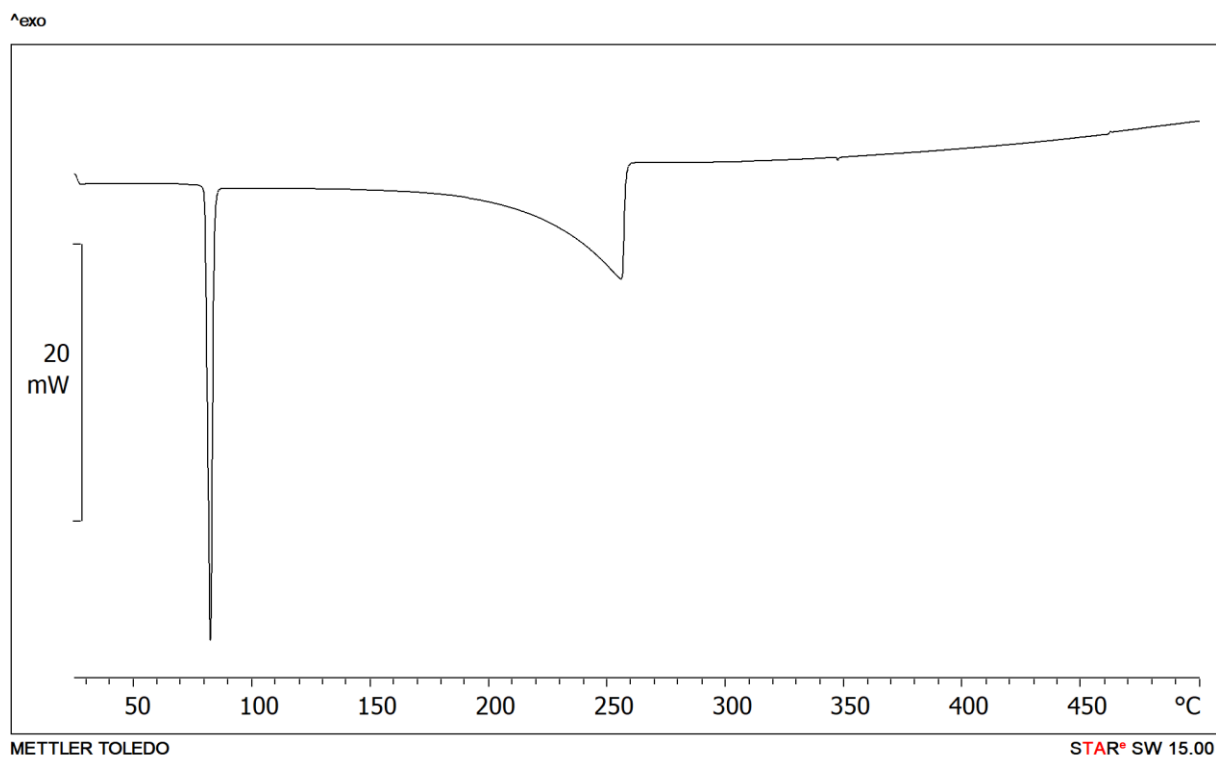

**Figure S20.** DSC curve of **van.**

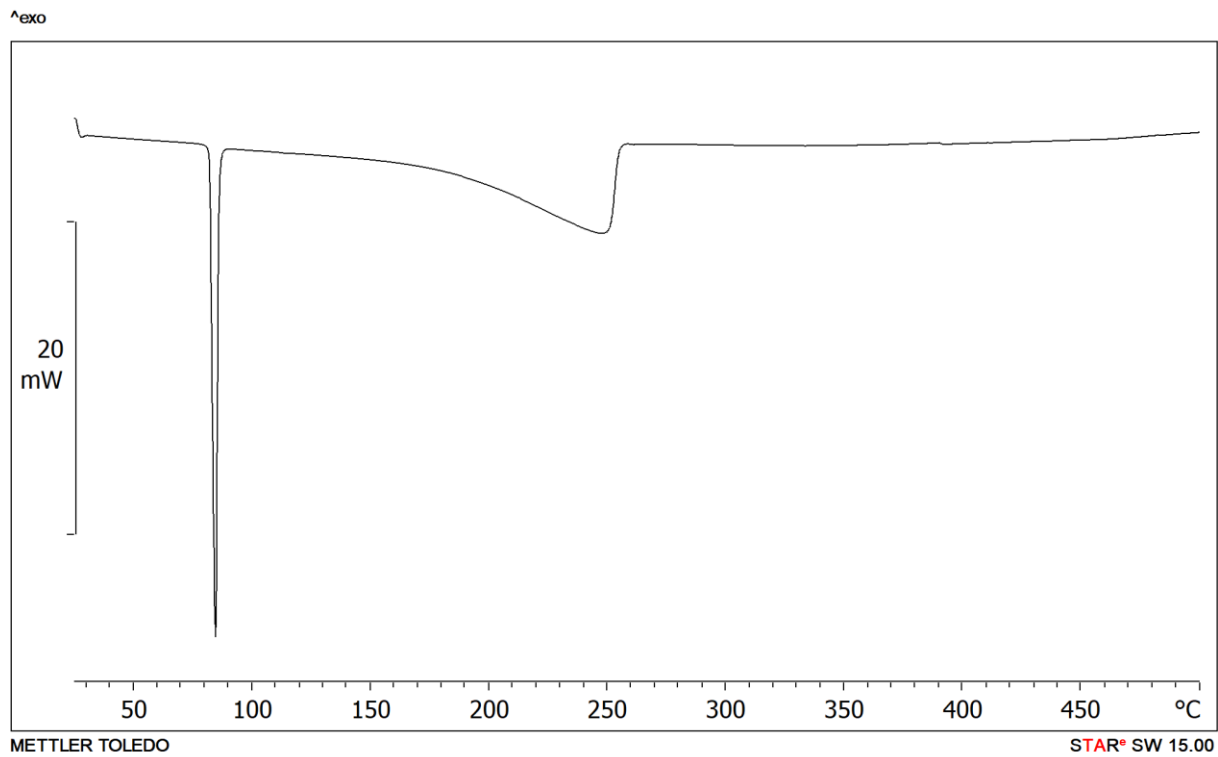

**Figure S21.** DSC curve of **(dmab)<sub>2</sub>(tfib).**

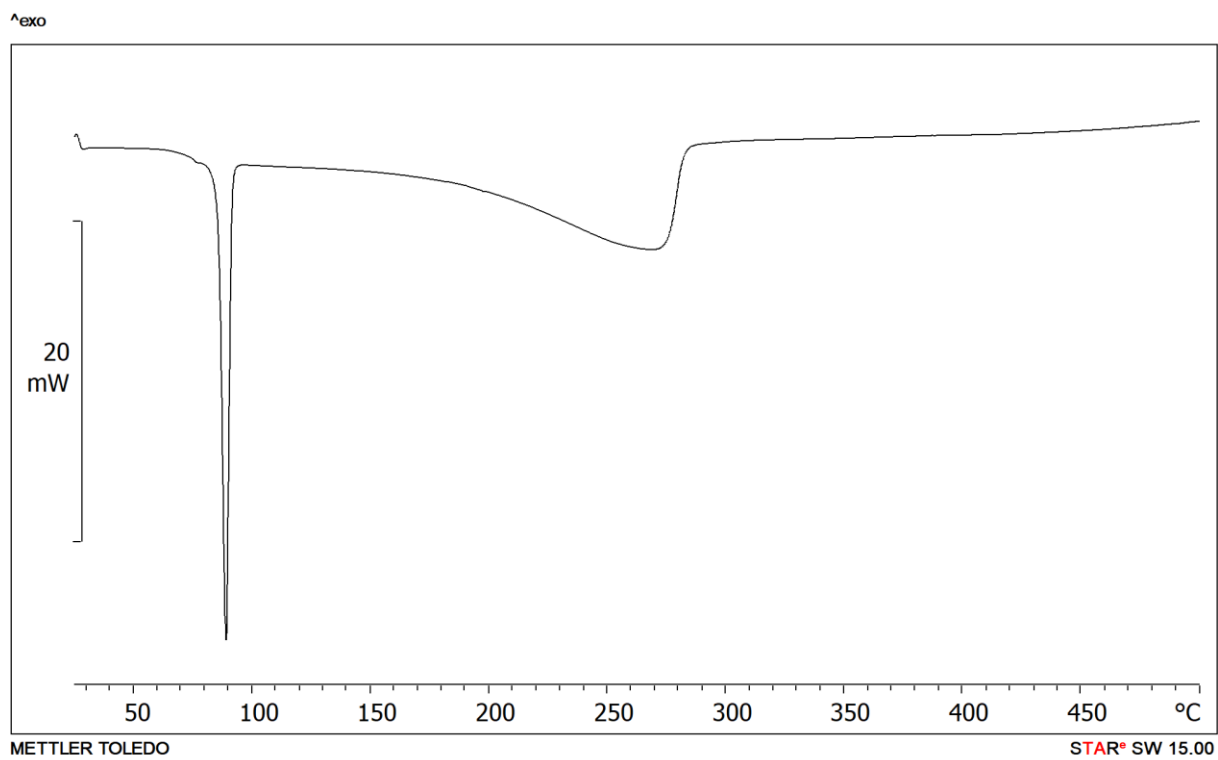

**Figure S22.** DSC curve of  $(\text{napht})_2(\text{tfib})$ .

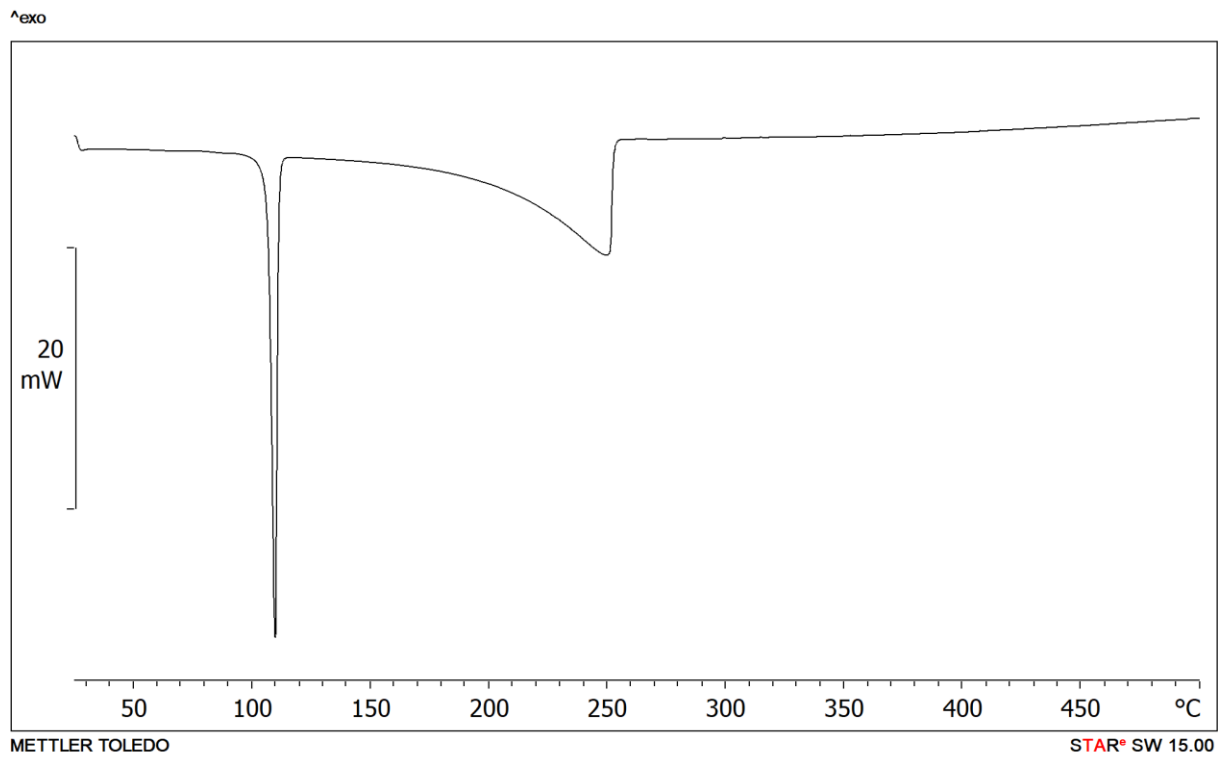

**Figure S23.** DSC curve of  $(\text{dmb})_2(\text{tfib})$ .

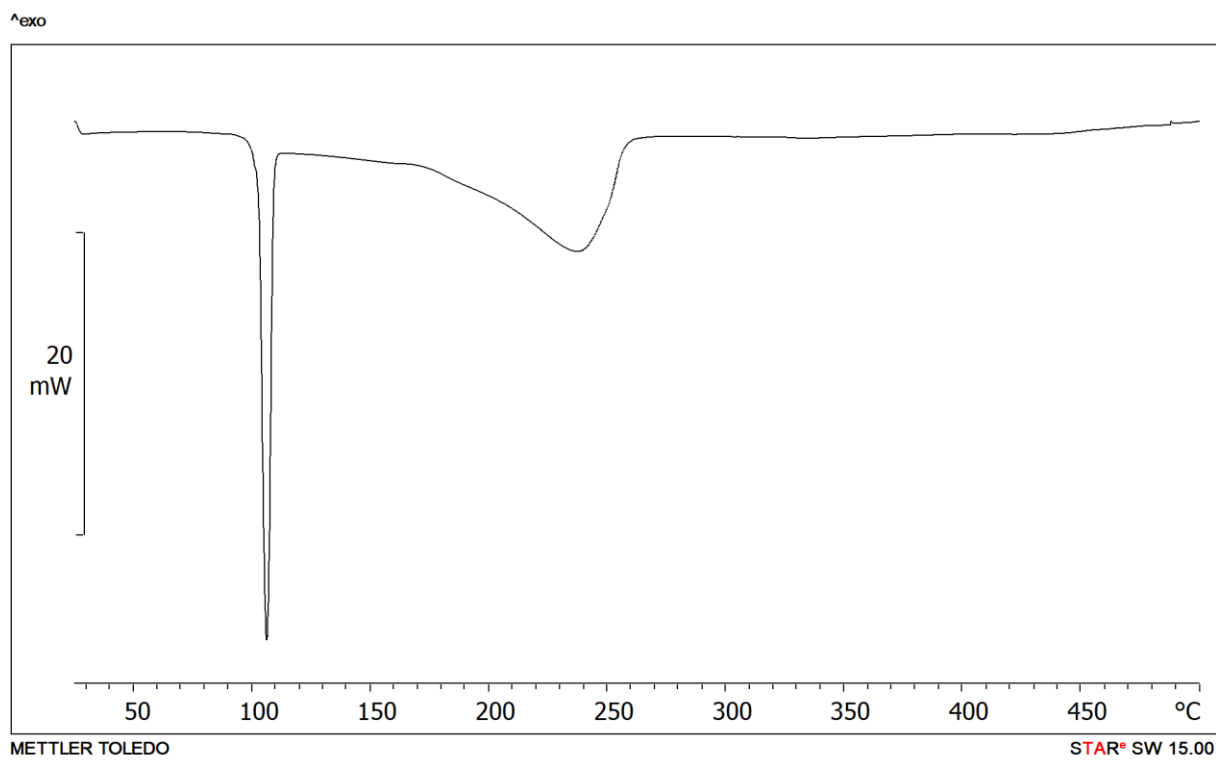

**Figure S24.** DSC curve of (van)(tfib).

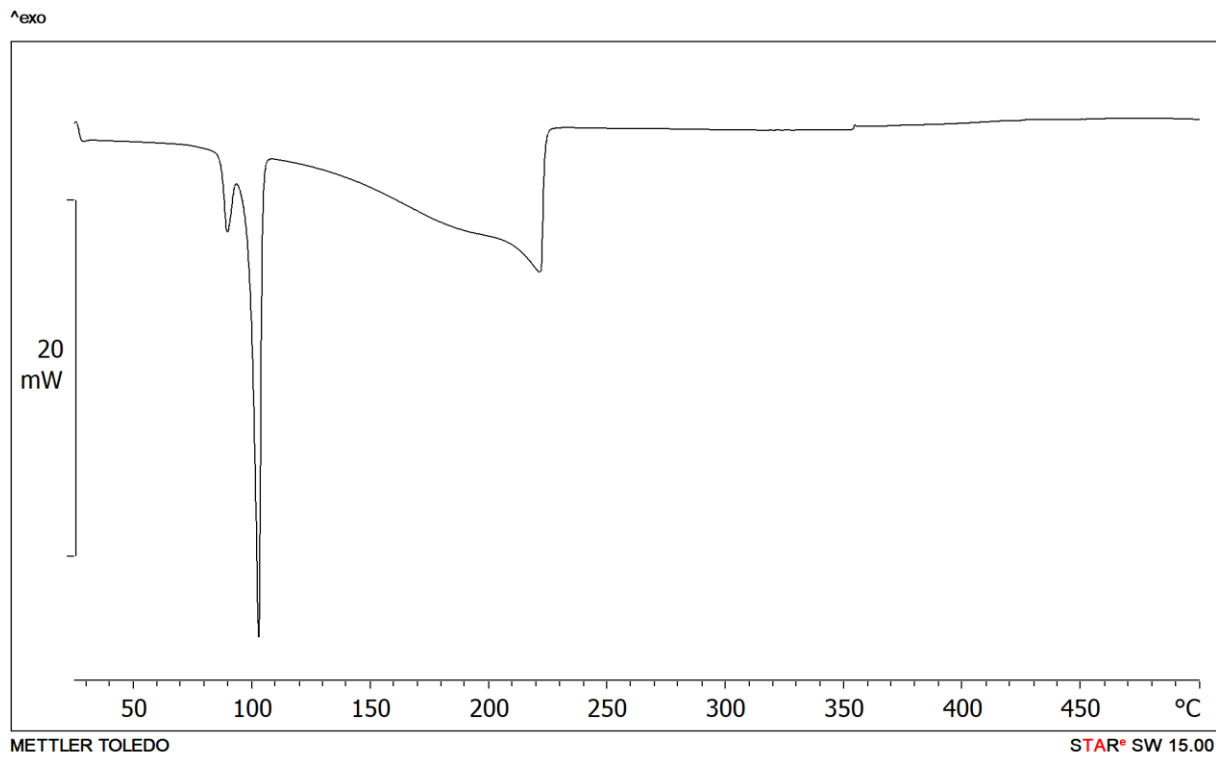

**Figure S25.** DSC curve of (pca)(tfib).
